# Supplementary material
Source: PubMed Central journal article supplement (PMC2874956)
Supplement: NIHMS201374-supplement-supplement_1.pdf [file NIHMS201374-supplement-supplement_1.pdf]

**Table 1 (Supplemental material). Association between the APOA2 -265T>C polymorphism and plasma APOA2 or APOA1 concentrations in the whole population and stratified by gender and by obesity in the Framingham Study**

|               |       | TOTAL    |        | MEN      |        | WOMEN    |        | NON-OBESE |        | OBESE    |        |
|---------------|-------|----------|--------|----------|--------|----------|--------|-----------|--------|----------|--------|
| APOA2 -265T>C |       | Mean     | SD     | Mean     | SD     | Mean     | SD     | Mean      | SD     | Mean     | SD     |
| APOA2 (mg/dL) | TT+TC | 36.5     | (7.1)  | 35.1     | (6.1)  | 38.2     | (7.4)  | 36.9      | (6.9)  | 35.3     | (6.9)  |
|               | CC    | 34.8     | (6.1)  | 32.8     | (5.4)  | 36.5     | (6.2)  | 35.4      | (6.1)  | 32.9     | (5.7)  |
|               |       | P<0.001  |        | P=0.001  |        | P=0.036  |        | P=0.007   |        | P=0.016  |        |
|               |       | P*=0.001 |        | P*=0.003 |        | P*=0.026 |        | P*=0.007  |        | P*=0.031 |        |
| APOA1 (mg/dL) | TT+TC | 152.5    | (25.8) | 142.2    | (20.9) | 162.9    | (25.6) | 155.4     | (25.8) | 144.4    | (24.1) |
|               | CC    | 153.4    | (26.3) | 141.3    | (21.1) | 163.9    | (26.1) | 156.6     | (26.7) | 144.1    | (22.6) |
|               |       | P=0.626  |        | P=0.704  |        | P=0.675  |        | P=0.567   |        | P=0.901  |        |
|               |       | P*=0.778 |        | P*=0.810 |        | P*=0.730 |        | P*=0.817  |        | P*=0.774 |        |

P: Unadjusted P values for comparison of means between APOA2 -265T>C genotypes

P\*: P values adjusted for gender, age, BMI, tobacco smoking, alcohol consumption, lipid medication and diabetes

Biochemical determinations for plasma APOA2 concentrations were available for 1217 individuals

**Table 2 (Supplemental material). Association between the APOA2 -265T>C polymorphism and dietary intake in men and women depending on the obesity status in the Framingham Study**

|                                | Obese* (n=368) |         |           |         | P <sup>1</sup> | P <sup>2</sup> | P <sup>3</sup> | Non-obese* (n=1086) |         |            |         | P <sup>1</sup> | P <sup>2</sup> | P <sup>3</sup> |
|--------------------------------|----------------|---------|-----------|---------|----------------|----------------|----------------|---------------------|---------|------------|---------|----------------|----------------|----------------|
|                                | TT+CT (n=307)  |         | CC (n=61) |         |                |                |                | TT+CT (n=910)       |         | CC (n=176) |         |                |                |                |
|                                | Mean           | SD      | Mean      | SD      |                |                |                | Mean                | SD      | Mean       | SD      |                |                |                |
| Age (years)                    | 55.7           | (8.7)   | 55.8      | (9.7)   | 0.942          |                |                | 55.4                | (9.5)   | 55.7       | (9.8)   | 0.684          |                |                |
| BMI (Kg/m <sup>2</sup> )       | 34             | (3.9)   | 34.1      | (4.1)   | 0.958          |                |                | 25.4                | (2.7)   | 25.3       | (2.7)   | 0.595          |                |                |
| Physical activity <sup>+</sup> | 36.6           | (7.6)   | 36.4      | (6.2)   | 0.902          | 0.879          | -              | 37.2                | (7.2)   | 36.7       | (6.9)   | 0.399          | 0.469          | -              |
| Total energy (Kcal/d)          | 1832.1         | (629.1) | 2097.3    | (735.1) | 0.008          | 0.004          | 0.004          | 1838.2              | (605.4) | 1891.5     | (614.3) | 0.337          | 0.307          | 0.309          |
| Total fat (g/d)                | 63.1           | (26.8)  | 71.2      | (28.2)  | 0.025          | 0.022          | 0.022          | 59.6                | (24.7)  | 60.1       | (24.1)  | 0.881          | 0.633          | 0.627          |
| SFA (g/d)                      | 22.3           | (9.9)   | 25.2      | (11.2)  | 0.042          | 0.040          | 0.040          | 20.9                | (9.3)   | 21.1       | (8.9)   | 0.792          | 0.551          | 0.543          |
| MUFA (g/d)                     | 24.2           | (10.6)  | 27.1      | (11.1)  | 0.029          | 0.027          | 0.028          | 22.6                | (9.8)   | 22.8       | (9.6)   | 0.941          | 0.671          | 0.662          |
| PUFA (g/d)                     | 12.5           | (5.8)   | 13.5      | (5.7)   | 0.221          | 0.206          | 0.202          | 11.9                | (5.3)   | 12.2       | (5.7)   | 0.914          | 0.796          | 0.793          |
| Protein (g/d)                  | 71.1           | (26.7)  | 80.2      | (29.7)  | 0.017          | 0.012          | 0.013          | 68.7                | (25.5)  | 69.4       | (26.1)  | 0.727          | 0.643          | 0.637          |
| Carbohydrate (g/d)             | 224.9          | (85.5)  | 263.6     | (103.4) | 0.005          | 0.006          | 0.005          | 237.6               | (90.1)  | 248.3      | (93.7)  | 0.252          | 0.153          | 0.156          |
| Fructose (g/d)                 | 22.8           | (14.2)  | 30.1      | (21.9)  | 0.010          | 0.009          | 0.009          | 25.2                | (15.3)  | 26.3       | (14.7)  | 0.332          | 0.233          | 0.236          |
| Cholesterol (mg/d)             | 231.9          | (101.8) | 262.2     | (107.2) | 0.027          | 0.022          | 0.022          | 219.1               | (99.4)  | 219.3      | (97.2)  | 0.952          | 0.773          | 0.763          |
| Dietary fiber (g/d)            | 18.4           | (7.7)   | 21.9      | (9.7)   | 0.055          | 0.049          | 0.046          | 19.2                | (8.4)   | 20.3       | (10.)   | 0.392          | 0.406          | 0.411          |
| PUFA n-3 (g/d)                 | 1.43           | (.7)    | 1.66      | (1.1)   | 0.074          | 0.054          | 0.055          | 1.3                 | (.6)    | 1.4        | (.6)    | 0.885          | 0.878          | 0.876          |
| PUFA n-6 (g/d)                 | 10.9           | (5.9)   | 13.1      | (10.7)  | 0.146          | 0.126          | 0.128          | 10.3                | (4.8)   | 10.7       | (5.5)   | 0.767          | 0.647          | 0.645          |
| Animal fat (g/d)               | 35.1           | (16.5)  | 40.1      | (17.7)  | 0.011          | 0.008          | 0.009          | 32.4                | (15.4)  | 32.3       | (14.8)  | 0.998          | 0.766          | 0.725          |
| Vegetal fat (g/d)              | 29.6           | (14.8)  | 32.1      | (16.1)  | 0.334          | 0.366          | 0.355          | 28.6                | (14.3)  | 29.4       | (14.9)  | 0.783          | 0.606          | 0.605          |
| Alcohol (g/d) in total         | 11.5           | (19.4)  | 12.2      | (24.9)  | 0.662          | 0.789          | 0.799          | 10.9                | (15.8)  | 11.1       | (15.7)  | 0.892          | 0.205          | 0.206          |
| Alcohol (g/d) in drinkers      | 15.9           | (21.3)  | 18.2      | (28.7)  | 0.556          | 0.498          | 0.467          | 14.6                | (16.8)  | 14.7       | (16.6)  | 0.988          | 0.675          | 0.671          |

P<sup>1</sup>: Unadjusted P values

P<sup>2</sup>: Adjusted for sex, age, BMI, tobacco smoking, alcohol consumption, lipid medication and diabetes

P<sup>3</sup>: Adjusted for sex, age, BMI, tobacco smoking, alcohol consumption, lipid medication, diabetes and physical activity

\*: No statistically significant differences in sex distribution were observed by the APOA2 polymorphism in obese (P=0.777) and non-obese (P=0.221 )

+: Physical activity was estimated as a physical activity score as indicated in Methods
